# Supplementary material for: Elevated Plasma D-Dimer Concentrations in Adults after an Outpatient-Treated COVID-19 Infection
Source: MDPI journal article supplement (doi:10.3390/v14112441), 2022-11-03
Supplement: s1 [file s1]

# Elevated Plasma D-Dimer concentrations in Adults after An Outpatient-Treated COVID-19 Infection

Christa Meisinger, Inge Kirchberger, Tobias D Warm, Alexander Hyhlik-Dürr, Yvonne Goßlau and Jakob Linseisen

## Supplementary material

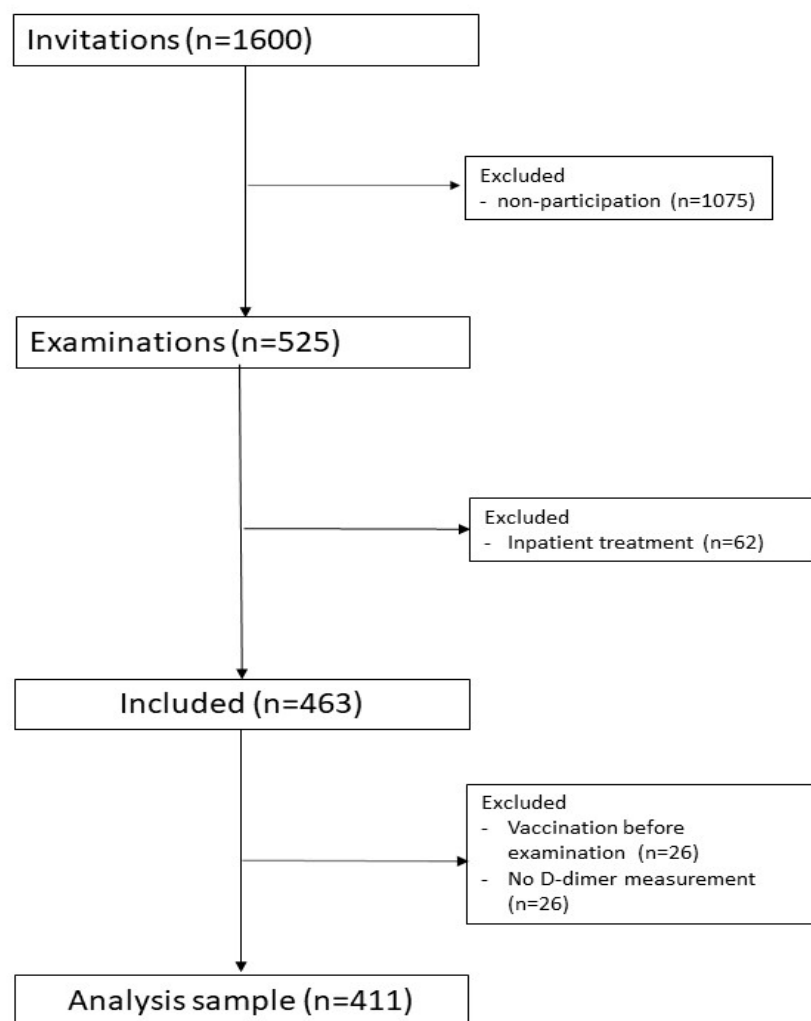

Figure S1. Flow chart.

**Table S1.** Characteristics of post-COVID-19 patients treated as outpatients (given as frequencies and percentages, or median and interquartile range), by plasma D-dimer concentrations of >500 to <1000 and  $\geq$  1000  $\mu\text{g/L}$ .

|                                                       | D-dimer >500 to<br><1000 $\mu\text{g/L}$ | D-dimer $\geq$ 1000<br>$\mu\text{g/L}$ | p-<br>value* |
|-------------------------------------------------------|------------------------------------------|----------------------------------------|--------------|
| <b>Clinical characteristics</b>                       | n = 44                                   | n = 17                                 |              |
| Sex (males)                                           | 16 (36.4)                                | 7 (41.2)                               | 0.7737       |
| Age (years)                                           | 57 (48.5;66.5)                           | 64 (52;73)                             | 0.1224       |
| School education (high)                               | 29 (65.9)                                | 11 (64.7)                              | 1.000        |
| Marital status (yes)                                  | 36 (81.8)                                | 11 (64.7)                              | 0.1838       |
| Body mass index ( $\text{kg/m}^2$ )                   | 25.9 (22.7; 29.1)                        | 24.8 (22.5; 27.3)                      | 0.3807       |
| Hypertension (yes)                                    | 13 (29.6)                                | 6 (35.3)                               | 0.7605       |
| Diabetes mellitus (yes)                               | 3 (6.8)                                  | 1 (5.9)                                | 1.000        |
| Depression (yes)                                      | 3 (6.8)                                  | 2 (11.8)                               | 0.6121       |
| Cardiovascular disease (yes)                          | 5 (11.4)                                 | 3 (17.7)                               | 0.6740       |
| Venous thromboembolism<br>before infection (yes)      | 2 (4.6)                                  | 4 (23.5)                               | 0.0457       |
| Chronic venous insufficiency<br>(yes)                 | 10 (22.7)                                | 4 (23.5)                               | 1.000        |
| Current smoker (yes)                                  | 18 (40.9)                                | 10 (58.8)                              | 0.2581       |
| Post COVID-19 fatigue (yes)                           | 17 (38.6)                                | 5 (29.4)                               | 0.5651       |
| Time since acute infection<br>(days)                  | 246.5 (135;322)                          | 260 (158;359)                          | 0.6039       |
| Anticoagulation therapy (yes)                         | 2 (4.6)                                  | 1 (5.9)                                | 1.000        |
| <b>Laboratory parameters</b>                          |                                          |                                        |              |
| White blood cell count (/nl)                          | 7.15 (6.2;7.74)                          | 7.50 (5.63;8.57)                       | 0.5095       |
| Hemoglobin (g/L)                                      | 140.5 (132.5;145)                        | 139 (126;148)                          | 0.4686       |
| Platelets (/nl)                                       | 220.5 (207.5;265)                        | 260 (189;281)                          | 0.6466       |
| Glucose (mg/dL)                                       | 87.5 (80.5;108)                          | 96 (79;114)                            | 0.6123       |
| aPTT (sec)                                            | 28 (26;31)                               | 29 (25;31)                             | 0.9548       |
| C-reactive protein (mg/dL)                            | 0.12 (0.06;0.37)                         | 0.16 (0.08;0.31)                       | 0.5819       |
| IL-6 (pg/ml) <sup>a</sup>                             | 3.50 (2.50; 3.815)                       | 3.62 (3.50; 4.14)                      | 0.0610       |
| D-dimer ( $\mu\text{g/L}$ )                           | 654 (562; 740)                           | 1475 (1143; 2384)                      | <.0001       |
| Anti- $\beta$ 2-glycoprotein IgG<br>antibodies (U/ml) | 2.35 (2.0;3.5)                           | 2.4 (2.0;4.6)                          | 0.6504       |
| Anti- $\beta$ 2-glycoprotein IgM<br>antibodies (U/ml) | 5.55 (2.0;11.75)                         | 5.2 (2.9;8.3)                          | 0.7888       |
| Anticardiolipin IgG antibodies<br>(U/ml)              | 2.0 (2.0;2.1)                            | 2.0 (2.0;2.8)                          | 0.4948       |
| Anticardiolipin IgM antibodies<br>(U/ml)              | 2.0 (2.0;3.3)                            | 2.0 (2.0;2.1)                          | 0.5451       |
| SARS-CoV-2 IgG antibodies<br>(U/ml)                   | 130.5 (44.5;267.5)                       | 327 (94.5;726)                         | 0.0943       |

<sup>a</sup>based on 40 and 13 participants, respectively; \*Fisher's exact test or Wilcoxon Rank Sum Test
